# Supplementary material for: Biomedical relation extraction with knowledge base–refined weak supervision
Source: Oxford University Press journal article supplement (doi:10.1093/database/baad054), 2023-01-01
Supplement: baad054_supp.zip [file baad054_supp.zip]

# Appendix of Biomedical relation extraction with knowledge base refined weak-supervision

## 1 Introduction

This appendix contains information on hyperparameter settings and the training log.

## 2 Hyperparameter settings

The hyperparameter settings employed in our study are presented below.

For the training of models on BC7-DrugProt datasets (including fine-tuning): learning rate=5e-06, epochs=200 for phase 1 and epochs=100 for phase 3

For the training of models on weakly datasets: learning rate=1e-05, epochs=4

For all experiments: max sequence length=192, batch size=32, warmup ratio=0.05. Seeds were from 0 to 4 or to 9. We used ['ENToGENEoMK', 'KMoGENEoTNE', 'ENToCHEMoMK', 'KMoCHEMoTNE'] as the markers for the entity and assigned these tokens to the additional special tokens key of the tokenizer.

When language model is "RoBERTa-large-PM-M3-Voc-hf": additional details on the model are: vocab size: 50005, hidden size: 1024.

We also made reproducible source code including default hyperparameter settings, pre-processed data and instructions publicly available on our GitHub repository: <https://github.com/dmis-lab/BioRE-drugprot-kuaz>

## 3 Training logs

The training log of our system (when the random seed is 0), denoted as *BC7DP-supervised (Transferred)* in the main manuscript, is presented below. The log includes information on the training loss and the learning rate, which is adjusted using the learning rate scheduler.

```
{'loss': 0.5408, 'learning_rate': 4.939979252087142e-07, 'epoch': 0.99}  
{'loss': 0.3124, 'learning_rate': 9.879958504174283e-07, 'epoch': 1.98}
```

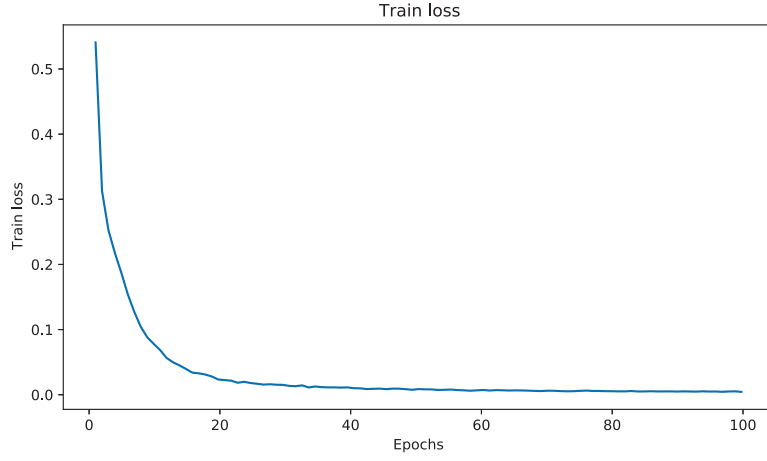

Figure 1: Training loss

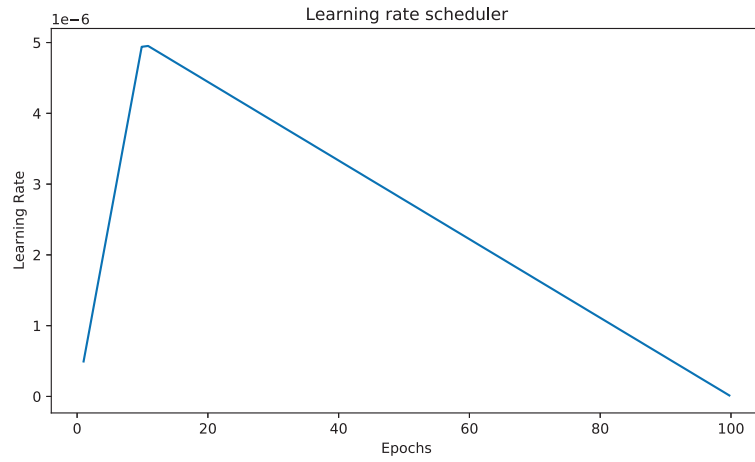

Figure 2: Learning rate

$\{'loss': 0.2525, 'learning\_rate': 1.4819937756261424e^{-06}, 'epoch': 2.96\}$   
 $\{'loss': 0.2174, 'learning\_rate': 1.9759917008348566e^{-06}, 'epoch': 3.95\}$   
 $\{'loss': 0.1868, 'learning\_rate': 2.469989626043571e^{-06}, 'epoch': 4.94\}$   
 $\{'loss': 0.1538, 'learning\_rate': 2.9639875512522847e^{-06}, 'epoch': 5.93\}$   
 $\{'loss': 0.1272, 'learning\_rate': 3.4579854764609994e^{-06}, 'epoch': 6.91\}$

{'loss': 0.1044, 'learning\_rate': 3.951983401669713e-06, 'epoch': 7.9}  
 {'loss': 0.0882, 'learning\_rate': 4.445981326878427e-06, 'epoch': 8.89}  
 {'loss': 0.0781, 'learning\_rate': 4.939979252087142e-06, 'epoch': 9.88}  
 {'loss': 0.0686, 'learning\_rate': 4.951798833515311e-06, 'epoch': 10.86}  
 {'loss': 0.0565, 'learning\_rate': 4.8969312564126486e-06, 'epoch': 11.85}  
 {'loss': 0.0498, 'learning\_rate': 4.842063679309986e-06, 'epoch': 12.84}  
 {'loss': 0.045, 'learning\_rate': 4.787196102207323e-06, 'epoch': 13.83}  
 {'loss': 0.0396, 'learning\_rate': 4.73232852510466e-06, 'epoch': 14.81}  
 {'loss': 0.0339, 'learning\_rate': 4.677460948001998e-06, 'epoch': 15.8}  
 {'loss': 0.0329, 'learning\_rate': 4.622593370899335e-06, 'epoch': 16.79}  
 {'loss': 0.031, 'learning\_rate': 4.567725793796672e-06, 'epoch': 17.78}  
 {'loss': 0.028, 'learning\_rate': 4.512858216694009e-06, 'epoch': 18.77}  
 {'loss': 0.0234, 'learning\_rate': 4.457990639591347e-06, 'epoch': 19.75}  
 {'loss': 0.0225, 'learning\_rate': 4.403123062488684e-06, 'epoch': 20.74}  
 {'loss': 0.0216, 'learning\_rate': 4.348255485386021e-06, 'epoch': 21.73}  
 {'loss': 0.0184, 'learning\_rate': 4.293387908283359e-06, 'epoch': 22.72}  
 {'loss': 0.0199, 'learning\_rate': 4.238520331180695e-06, 'epoch': 23.7}  
 {'loss': 0.018, 'learning\_rate': 4.183652754078033e-06, 'epoch': 24.69}  
 {'loss': 0.0169, 'learning\_rate': 4.12878517697537e-06, 'epoch': 25.68}  
 {'loss': 0.0156, 'learning\_rate': 4.0739175998727074e-06, 'epoch': 26.67}  
 {'loss': 0.0161, 'learning\_rate': 4.019050022770045e-06, 'epoch': 27.65}  
 {'loss': 0.0154, 'learning\_rate': 3.964182445667382e-06, 'epoch': 28.64}  
 {'loss': 0.0152, 'learning\_rate': 3.9093148685647195e-06, 'epoch': 29.63}  
 {'loss': 0.0136, 'learning\_rate': 3.854447291462057e-06, 'epoch': 30.62}  
 {'loss': 0.0131, 'learning\_rate': 3.799579714359394e-06, 'epoch': 31.6}  
 {'loss': 0.0144, 'learning\_rate': 3.7447121372567312e-06, 'epoch': 32.59}  
 {'loss': 0.0112, 'learning\_rate': 3.689844560154068e-06, 'epoch': 33.58}  
 {'loss': 0.0127, 'learning\_rate': 3.634976983051406e-06, 'epoch': 34.57}  
 {'loss': 0.0117, 'learning\_rate': 3.580109405948743e-06, 'epoch': 35.56}  
 {'loss': 0.0113, 'learning\_rate': 3.5252418288460803e-06, 'epoch': 36.54}  
 {'loss': 0.0113, 'learning\_rate': 3.4703742517434177e-06, 'epoch': 37.53}  
 {'loss': 0.011, 'learning\_rate': 3.415506674640755e-06, 'epoch': 38.52}  
 {'loss': 0.0113, 'learning\_rate': 3.360639097538092e-06, 'epoch': 39.51}  
 {'loss': 0.0101, 'learning\_rate': 3.3057715204354298e-06, 'epoch': 40.49}  
 {'loss': 0.0098, 'learning\_rate': 3.2509039433327667e-06, 'epoch': 41.48}  
 {'loss': 0.0087, 'learning\_rate': 3.196036366230104e-06, 'epoch': 42.47}  
 {'loss': 0.0091, 'learning\_rate': 3.141168789127441e-06, 'epoch': 43.46}  
 {'loss': 0.0094, 'learning\_rate': 3.086301212024779e-06, 'epoch': 44.44}  
 {'loss': 0.0086, 'learning\_rate': 3.0314336349221158e-06, 'epoch': 45.43}  
 {'loss': 0.0094, 'learning\_rate': 2.9765660578194527e-06, 'epoch': 46.42}  
 {'loss': 0.0093, 'learning\_rate': 2.92169848071679e-06, 'epoch': 47.41}  
 {'loss': 0.0086, 'learning\_rate': 2.8668309036141275e-06, 'epoch': 48.4}  
 {'loss': 0.0076, 'learning\_rate': 2.811963326511465e-06, 'epoch': 49.38}  
 {'loss': 0.0087, 'learning\_rate': 2.7570957494088018e-06, 'epoch': 50.37}  
 {'loss': 0.0083, 'learning\_rate': 2.7022281723061396e-06, 'epoch': 51.36}  
 {'loss': 0.0082, 'learning\_rate': 2.6473605952034765e-06, 'epoch': 52.35}

{'loss': 0.0074, 'learning\_rate': 2.592493018100814e-06, 'epoch': 53.33}  
 {'loss': 0.0076, 'learning\_rate': 2.537625440998151e-06, 'epoch': 54.32}  
 {'loss': 0.008, 'learning\_rate': 2.4827578638954886e-06, 'epoch': 55.31}  
 {'loss': 0.0072, 'learning\_rate': 2.427890286792826e-06, 'epoch': 56.3}  
 {'loss': 0.0068, 'learning\_rate': 2.373022709690163e-06, 'epoch': 57.28}  
 {'loss': 0.0062, 'learning\_rate': 2.3181551325875003e-06, 'epoch': 58.27}  
 {'loss': 0.0067, 'learning\_rate': 2.2632875554848373e-06, 'epoch': 59.26}  
 {'loss': 0.0073, 'learning\_rate': 2.2084199783821746e-06, 'epoch': 60.25}  
 {'loss': 0.0065, 'learning\_rate': 2.153552401279512e-06, 'epoch': 61.23}  
 {'loss': 0.0071, 'learning\_rate': 2.0986848241768494e-06, 'epoch': 62.22}  
 {'loss': 0.0069, 'learning\_rate': 2.0438172470741868e-06, 'epoch': 63.21}  
 {'loss': 0.0065, 'learning\_rate': 1.9889496699715237e-06, 'epoch': 64.2}  
 {'loss': 0.0067, 'learning\_rate': 1.934082092868861e-06, 'epoch': 65.19}  
 {'loss': 0.0066, 'learning\_rate': 1.8792145157661984e-06, 'epoch': 66.17}  
 {'loss': 0.0063, 'learning\_rate': 1.8243469386635356e-06, 'epoch': 67.16}  
 {'loss': 0.0059, 'learning\_rate': 1.769479361560873e-06, 'epoch': 68.15}  
 {'loss': 0.0057, 'learning\_rate': 1.7146117844582103e-06, 'epoch': 69.14}  
 {'loss': 0.0062, 'learning\_rate': 1.6597442073555475e-06, 'epoch': 70.12}  
 {'loss': 0.0061, 'learning\_rate': 1.6048766302528849e-06, 'epoch': 71.11}  
 {'loss': 0.0056, 'learning\_rate': 1.550009053150222e-06, 'epoch': 72.1}  
 {'loss': 0.0053, 'learning\_rate': 1.4951414760475594e-06, 'epoch': 73.09}  
 {'loss': 0.0054, 'learning\_rate': 1.4402738989448966e-06, 'epoch': 74.07}  
 {'loss': 0.006, 'learning\_rate': 1.385406321842234e-06, 'epoch': 75.06}  
 {'loss': 0.0064, 'learning\_rate': 1.3305387447395713e-06, 'epoch': 76.05}  
 {'loss': 0.0058, 'learning\_rate': 1.2756711676369085e-06, 'epoch': 77.04}  
 {'loss': 0.0058, 'learning\_rate': 1.2208035905342456e-06, 'epoch': 78.02}  
 {'loss': 0.0055, 'learning\_rate': 1.165936013431583e-06, 'epoch': 79.01}  
 {'loss': 0.0054, 'learning\_rate': 1.1110684363289202e-06, 'epoch': 80.0}  
 {'loss': 0.0052, 'learning\_rate': 1.0562008592262575e-06, 'epoch': 80.99}  
 {'loss': 0.0052, 'learning\_rate': 1.0013332821235949e-06, 'epoch': 81.98}  
 {'loss': 0.0057, 'learning\_rate': 9.46465705020932e-07, 'epoch': 82.96}  
 {'loss': 0.005, 'learning\_rate': 8.915981279182693e-07, 'epoch': 83.95}  
 {'loss': 0.0051, 'learning\_rate': 8.367305508156067e-07, 'epoch': 84.94}  
 {'loss': 0.0054, 'learning\_rate': 7.81862973712944e-07, 'epoch': 85.93}  
 {'loss': 0.0051, 'learning\_rate': 7.269953966102812e-07, 'epoch': 86.91}  
 {'loss': 0.0051, 'learning\_rate': 6.721278195076184e-07, 'epoch': 87.9}  
 {'loss': 0.0052, 'learning\_rate': 6.172602424049557e-07, 'epoch': 88.89}  
 {'loss': 0.0049, 'learning\_rate': 5.62392665302293e-07, 'epoch': 89.88}  
 {'loss': 0.0052, 'learning\_rate': 5.075250881996302e-07, 'epoch': 90.86}  
 {'loss': 0.005, 'learning\_rate': 4.526575110969675e-07, 'epoch': 91.85}  
 {'loss': 0.0048, 'learning\_rate': 3.9778993399430475e-07, 'epoch': 92.84}  
 {'loss': 0.0053, 'learning\_rate': 3.4292235689164207e-07, 'epoch': 93.83}  
 {'loss': 0.0049, 'learning\_rate': 2.8805477978897933e-07, 'epoch': 94.81}  
 {'loss': 0.005, 'learning\_rate': 2.3318720268631657e-07, 'epoch': 95.8}  
 {'loss': 0.0045, 'learning\_rate': 1.7831962558365386e-07, 'epoch': 96.79}  
 {'loss': 0.005, 'learning\_rate': 1.2345204848099113e-07, 'epoch': 97.78}

$\{'loss' : 0.0053, 'learning\_rate' : 6.858447137832842e^{-08}, 'epoch' : 98.77\}$   
 $\{'loss' : 0.0044, 'learning\_rate' : 1.3716894275665682e^{-08}, 'epoch' : 99.75\}$
